# Supplementary material for: Selectivity behaviour of two roof-shaped host compounds in the presence of xylene and ethylbenzene guest mixtures
Source: Royal Society of Chemistry journal article supplement (doi:10.1039/d1ce01149a), 2021-01-01
Supplement: d1ce01149a1.pdf [file d1ce01149a1.pdf]

## SUPPLEMENTARY INFORMATION

### Selectivity behaviour of two roof-shaped host compounds in the presence of xylene and ethylbenzene guest mixtures

Benita Barton,\* Brandon Barnardo and Eric C. Hosten

*Department of Chemistry, PO Box 77000, Nelson Mandela University, Port Elizabeth, 6031, South Africa. E-mail: [benita.barton@mandela.ac.za](mailto:benita.barton@mandela.ac.za)*

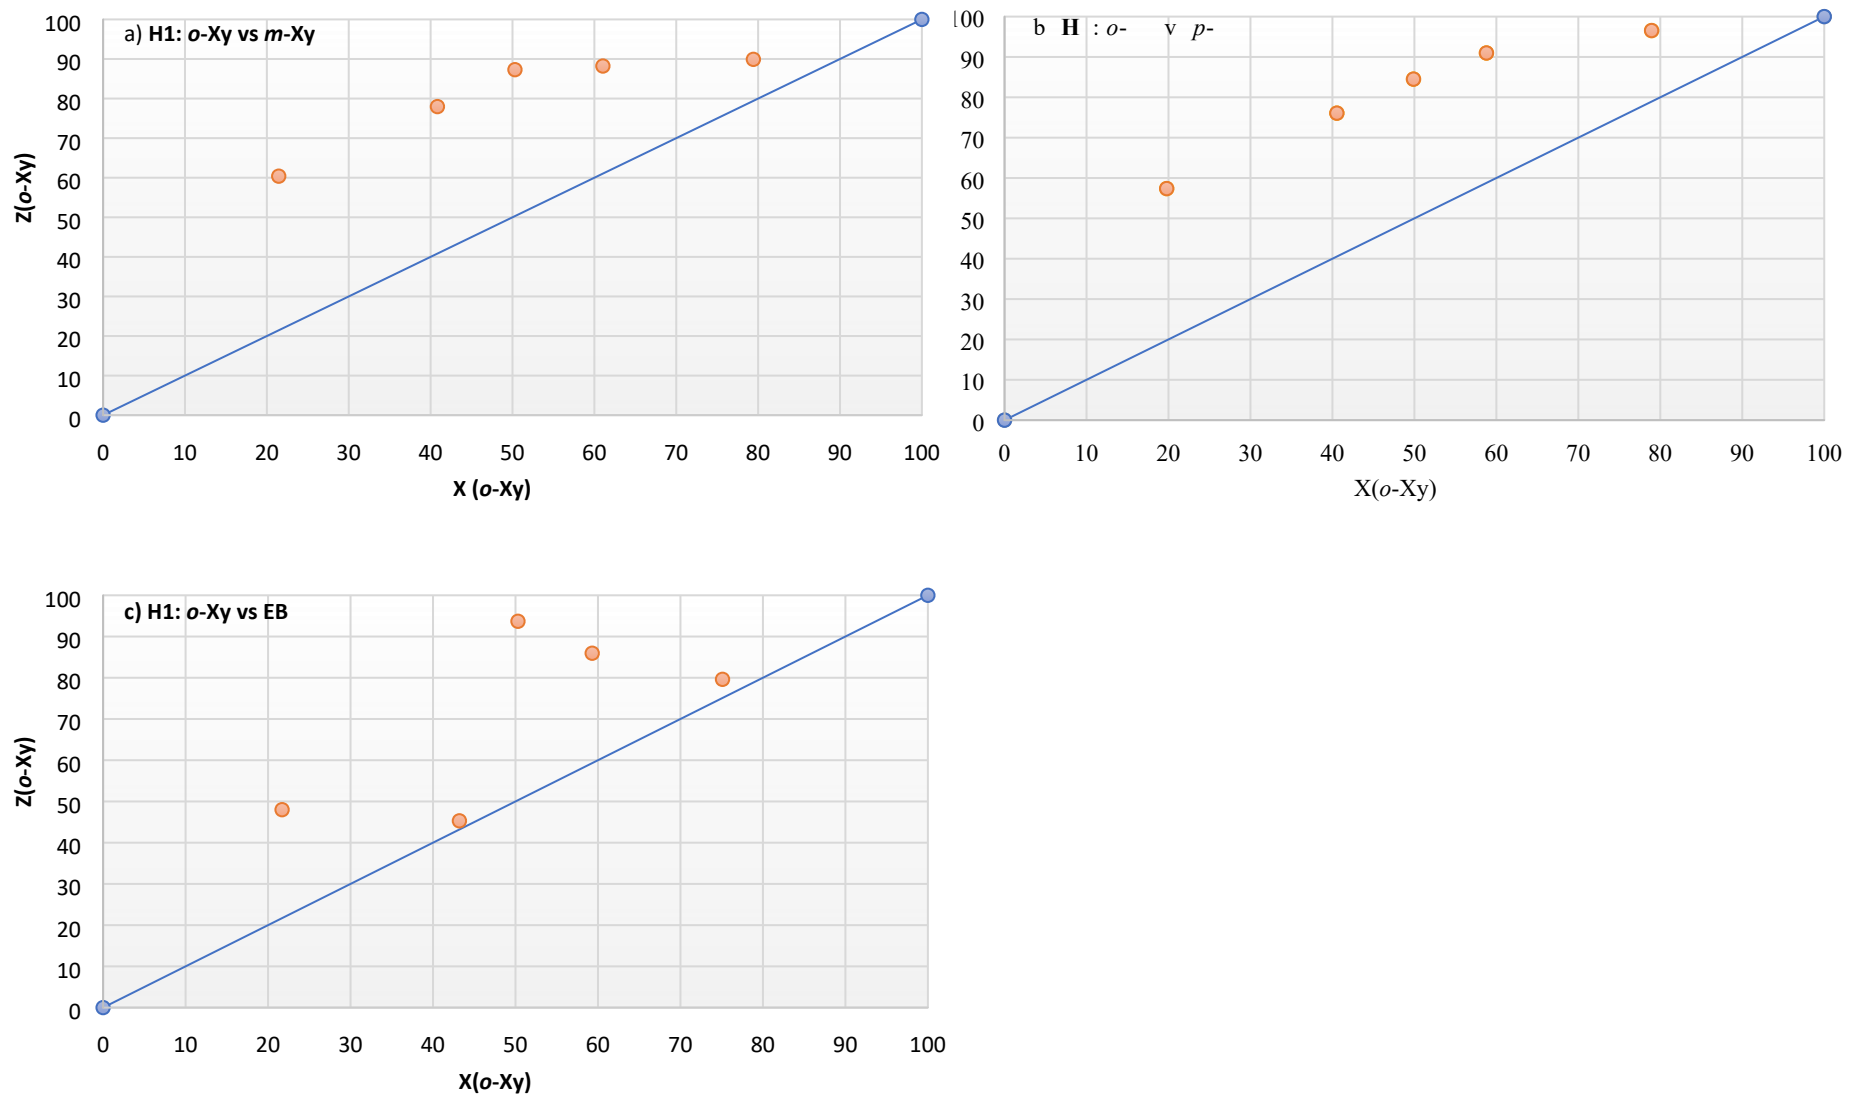

**Fig. S1** Selectivity profiles of H1 when recrystallised from various a) *o*-Xy/*m*-Xy, b) *o*-Xy/*p*-Xy and c) *o*-Xy/EB binary guest mixtures; all other binary combinations did not furnish any crystals.

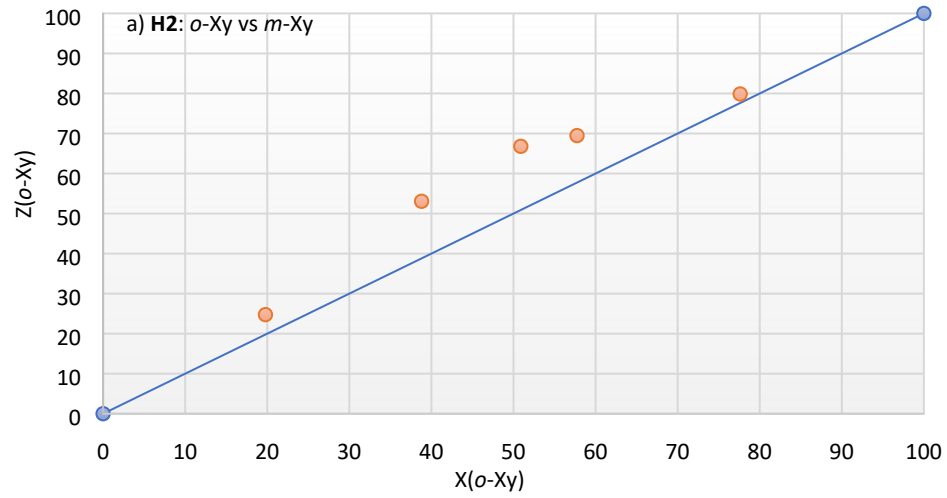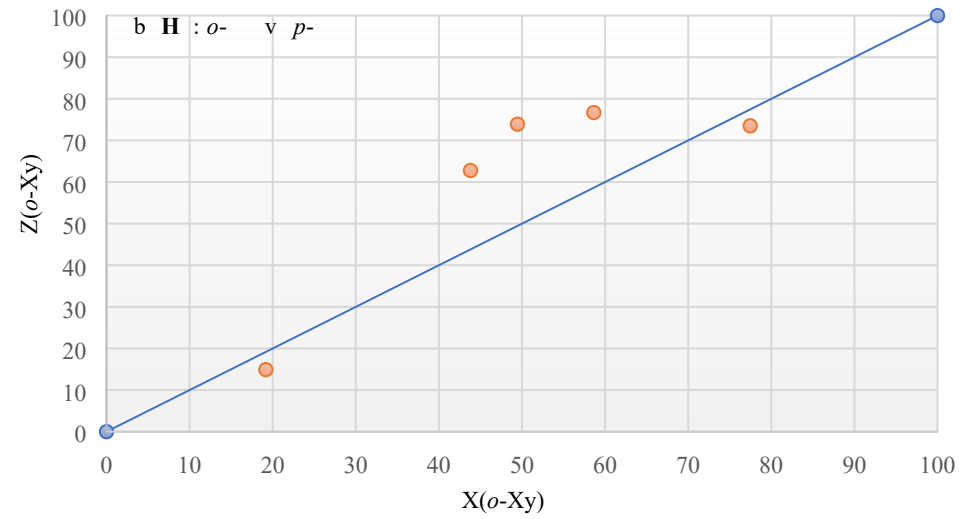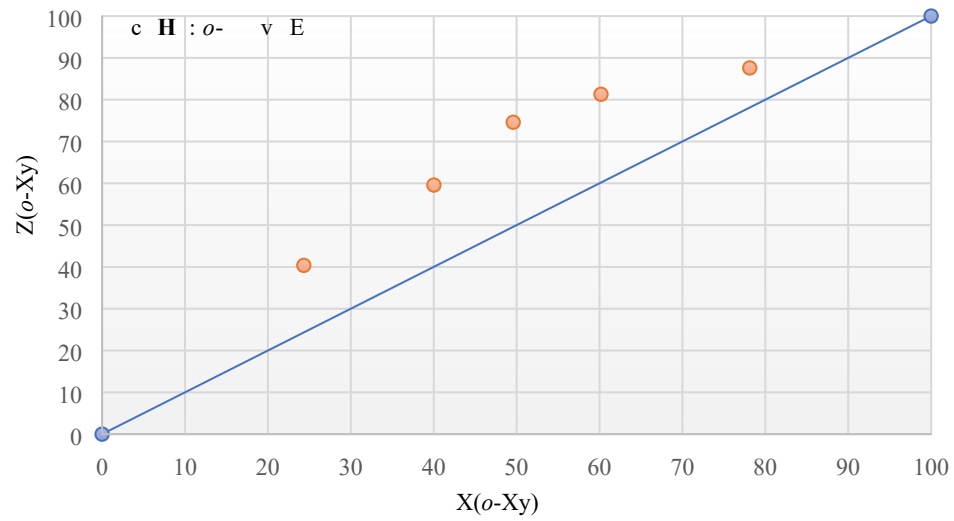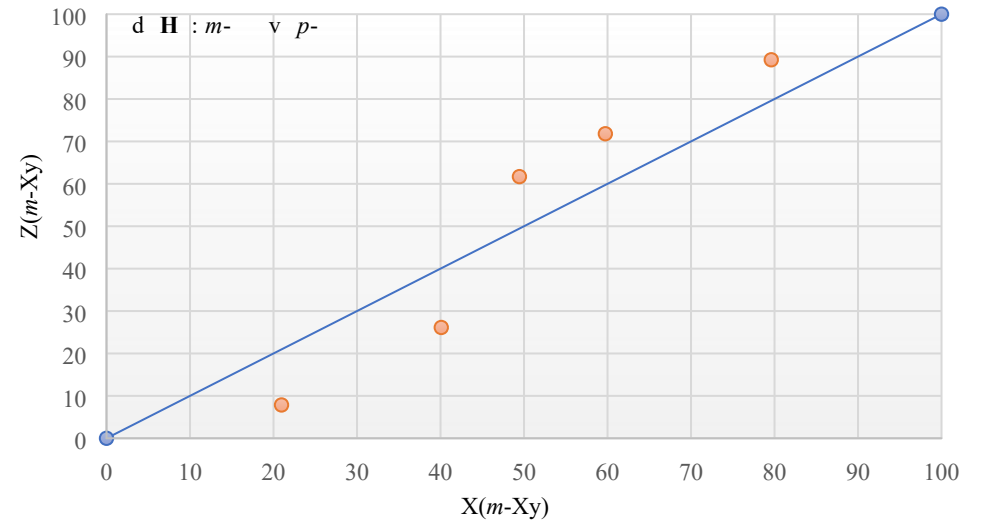

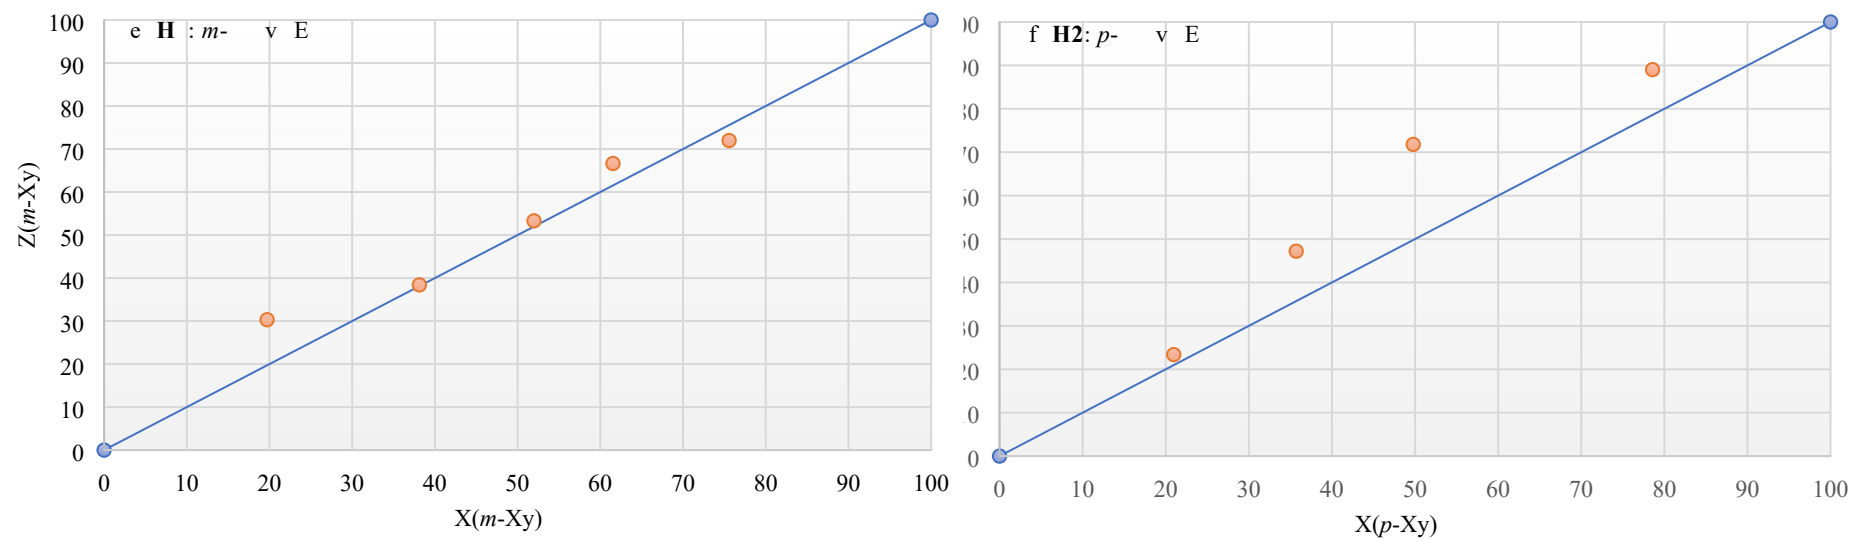

**Fig. S2** Selectivity profiles of H<sub>2</sub> when recrystallised from a) *o*-Xy/*m*-Xy, b) *o*-Xy/*p*-Xy, c) *o*-Xy/EB, d) *m*-Xy/*p*-Xy, e) *m*-Xy/EB and f) *p*-Xy/EB binary guest mixtures where guest concentrations were sequentially varied.

a)

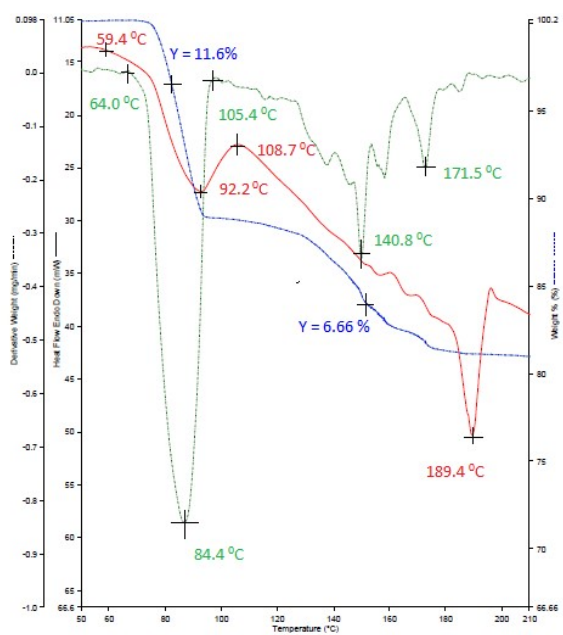

b)

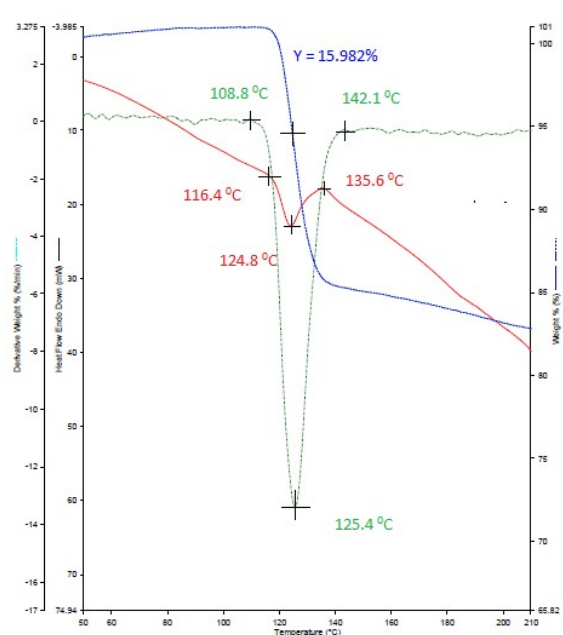

c)

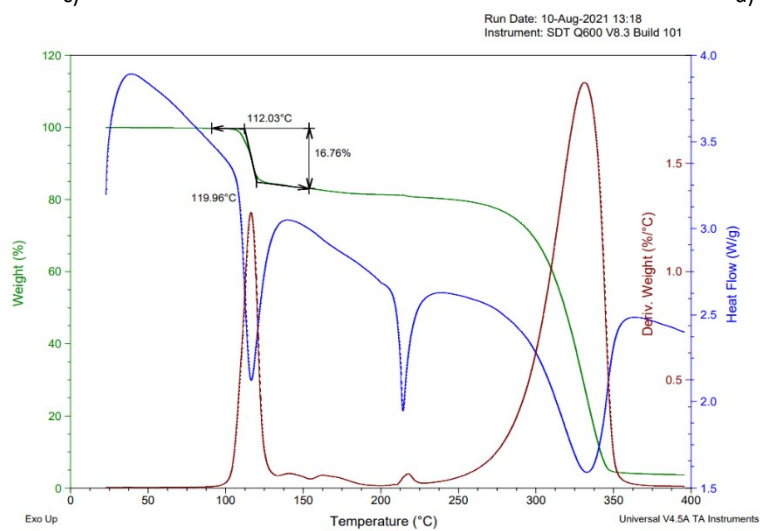

d)

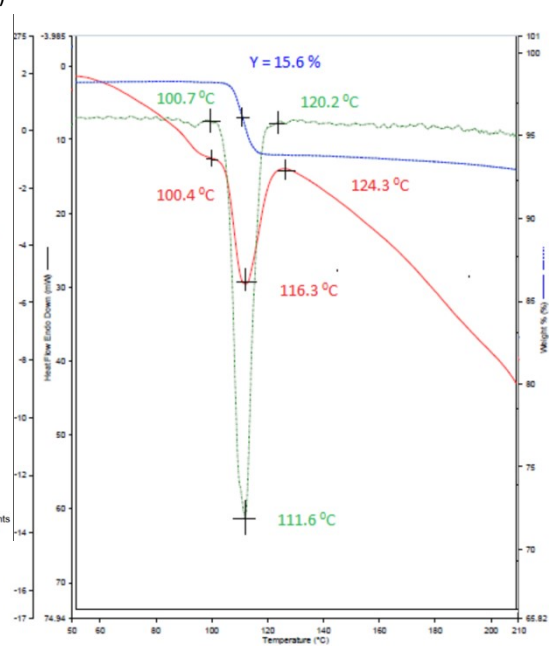

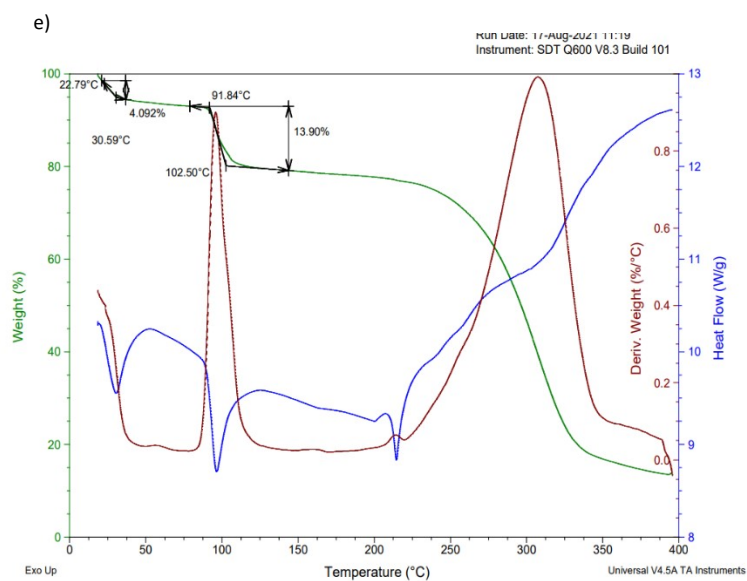

**Fig. S3** Overlaid DSC (red), TG (blue) and DTG (green) traces for a) **H1-*o*-Xy**, b) **H2-*o*-Xy**, c) **H2-*m*-Xy**, d) **H2-*p*-Xy** and e) **H2-EB**.
